# Supplementary material
Source: PubMed Central journal article supplement (PMC3326504)
Supplement: 1120841109_pnas.201120841SI.pdf [file 1120841109_pnas.201120841SI.pdf]

# Supporting Information

Mirouze et al. 10.1073/pnas.1120841109

## SI Materials and Methods

**INDEL Marker Analyses.** Plants from the four F2 populations were grown in vitro on 1/2 MS. Four-day-old individual seedlings were harvested and DNA extraction, PCR and genotyping were executed as described (1). See Table S5 for INDEL marker details.

**High-Throughput KASP Genotyping for SNPs.** For the genome-wide measurement of meiotic recombination, a set of 29 SNPs was selected across the *A. thaliana* genome according to the position of *met1*-like methylation blocks in the epiRILs epi01 and epi12 (2) and to chromatin properties (euchromatic vs. heterochromatic regions, see Fig. S1 and Table S1). Plants from the four F2 mapping populations were grown in vitro on 1/2MS. Individual seedlings were harvested and were either immediately frozen or lyophilized before DNA extraction 2 wk after germination. DNA extraction was carried out by using the NucleoSpin 96 Plant II kit (Macherey-Nagel), according to the manufacturer's instructions. Following the lysis step, the samples were loaded onto the Genesis RSP-150 robot (Tecan) for continuation of the extraction procedure. We used competitive allele-specific PCR genotyping technology to analyze single-nucleotide polymorphism (SNP) markers. For each SNP, KASP-genotyping primers were designed and validated. High-throughput genotyping was per-

formed on a 96 × 96 Dynamic Array IFC (Fluidigm), loading the 32 assays in triplicate. The 96 samples on each array were composed of 2–4 no-template controls, 2 samples of each known control (Columbia, Landsberg, or F1 heterozygote plant), and 86–88 F2 DNA samples. PCR cycling was performed on BioMark (Fluidigm) using the following conditions: 70 °C for 30 s (thermal mixing), 25 °C for 6 s, and 94 °C for 15 min (hot-start activation), followed by 10 cycles of touchdown PCR denaturing at 94 °C for 20 s and annealing/elongation at 65–57 °C for 1 min, dropping 0.8 °C per cycle. Amplification was proceeded for an additional 40 cycles of 94 °C for 15 s and 57 °C for 1 min. Endpoint fluorescence was measured at 37 °C on BioMark for the two allele-specific fluorescent dyes: the Columbia allele labeled by FAM (485 nm excitation, 520 nm emission) and the Landsberg allele labeled by VIC (534 nm excitation, 556 nm emission). ROX was used as an internal reference fluorescent dye (575 nm excitation, 610 nm emission). Usually, a recycling step was added for better clustering of data points. This step included 10 cycles of 95 °C for 15 s and 60 °C for 1 min. Data were analyzed by using the Fluidigm SNP Genotyping Analysis software. We estimated the error rate of our genotyping scoring to be 1%.

1. Edwards K, Johnstone C, Thompson C (1991) A simple and rapid method for the preparation of plant genomic DNA for PCR analysis. *Nucleic Acids Res* 19:1349.

2. Reinders J, et al. (2009) Compromised stability of DNA methylation and transposon immobilization in mosaic *Arabidopsis* epigenomes. *Genes Dev* 23:939–950.

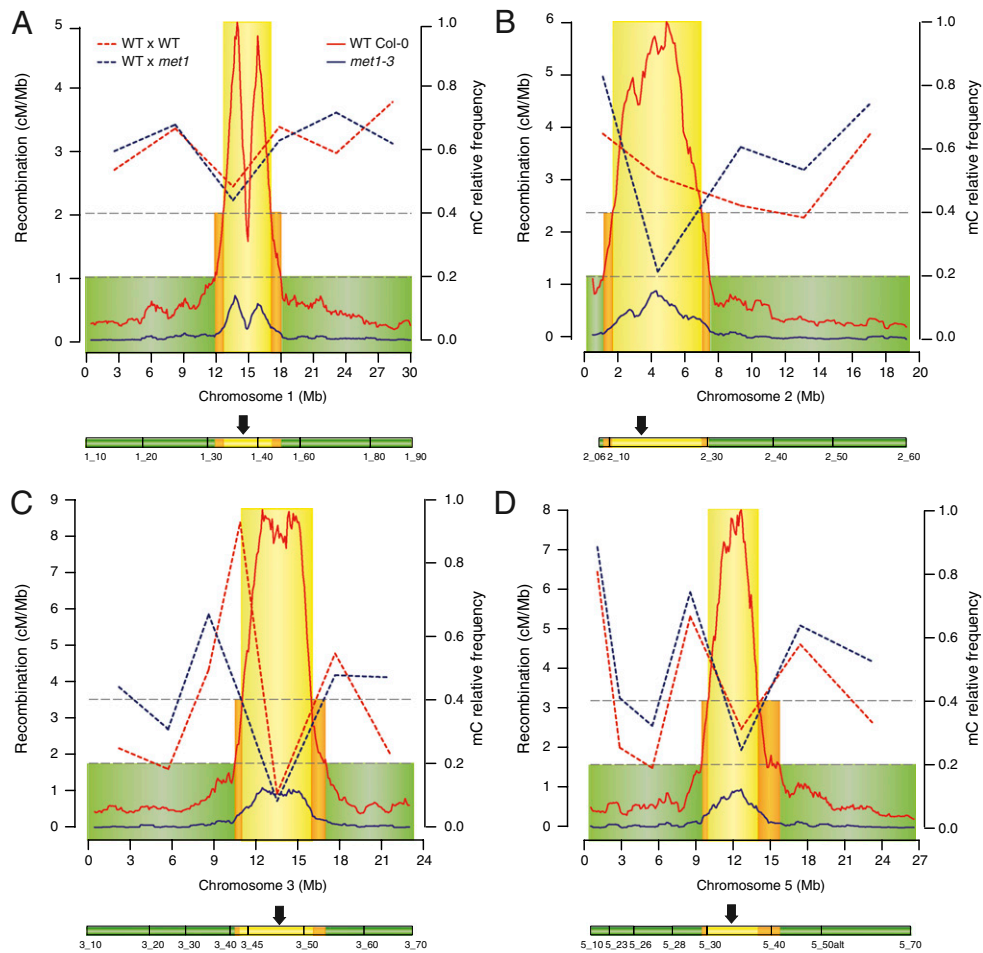

**Fig. S1.** Absolute recombination rates for WTxWT and WTxmet1 using KASP markers at intervals differing in their DNA methylation level. MRRs were calculated for each interval for WTxWT (red dotted curve) and WTxmet1 (blue dotted curve) populations and are represented along *Arabidopsis* chromosomes. The methylcytosine (mC) density plots were obtained from bisulfite-sequencing data (1, 2) using a 100,000-base sliding window with 10-base steps. The WT Col-0 (red curve) and met1-3 (blue curve) mC densities are relative to the highest methylation level detected in WT Col-0 plants. KASP intervals (green box, 0–20% mC; orange box, 20–40% mC, yellow box, >40% mC) analyzed in this study are depicted below the graphs. KASP marker details are given in Table S5. (A) Chromosome 1. Note that the drop at the centromere is due to the sequencing coverage (1). (B) Chromosome 2. (C) Chromosome 3. (D) Chromosome 5.

1. Lister R, et al. (2008) Highly integrated single-base resolution maps of the epigenome in *Arabidopsis*. *Cell* 133:523–536.
2. Cokus SJ, et al. (2008) Shotgun bisulphite sequencing of the *Arabidopsis* genome reveals DNA methylation patterning. *Nature* 452:215–219.

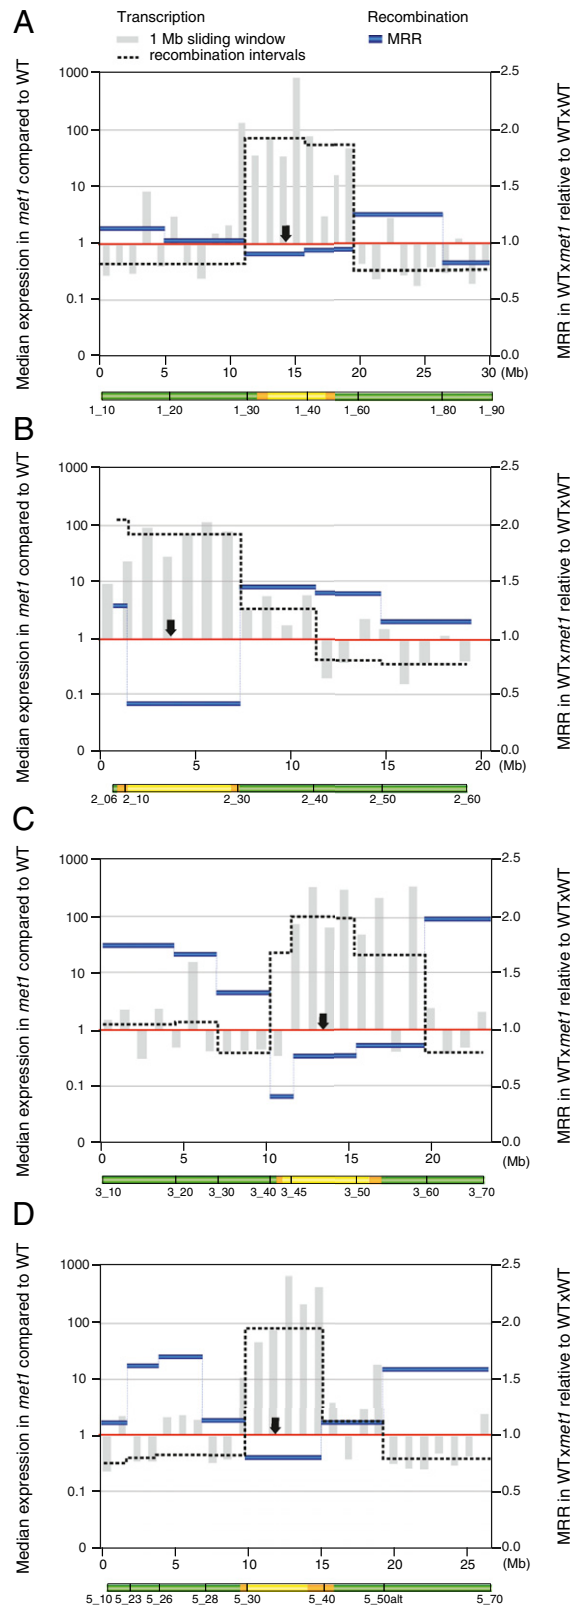

**Fig. S2.** Expression levels in *met1* compared with MRR in WT*xmet1*. Expression in *met1* mutant plants from Lister et al. (1) was analyzed by using a 1-Mb sliding window (gray bars), and the median level was calculated for each KASP interval (dotted black line). For comparison, relative MRR (WT*xmet1* relative to WTxWT, as in Fig. 2) is represented along the four chromosomes (black arrow, centromere localization; Mb, chromosome coordinates in Mb). The red lines mark both WT expression level and WTxWT recombination level set at 1. (A) Chromosome 1. (B) Chromosome 2. (C) Chromosome 3. (D) Chromosome 5.

1. Lister R, et al. (2008) Highly integrated single-base resolution maps of the epigenome in *Arabidopsis*. *Cell* 133:523–536.

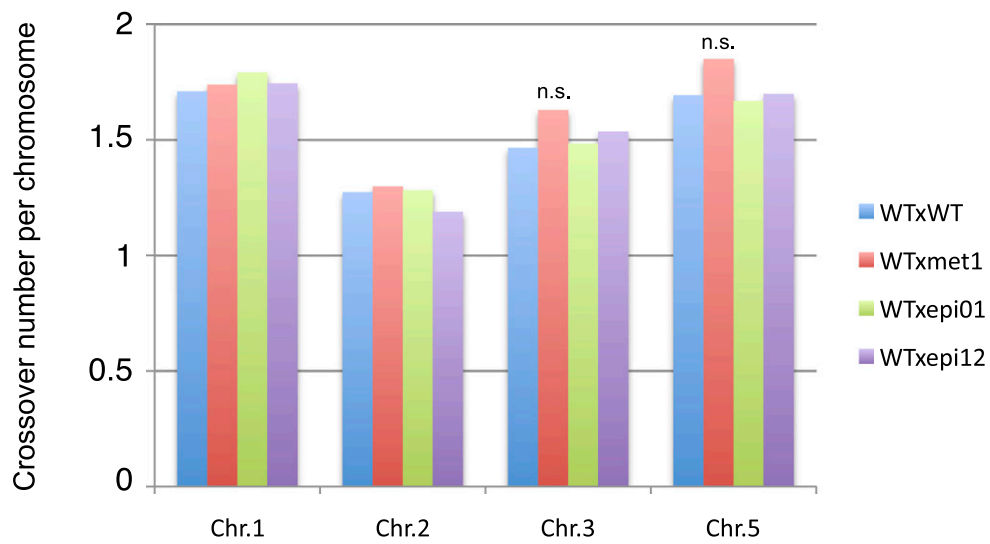

**Fig. S3.** CO number per chromosome per plant in the four F2 populations. CO numbers were calculated by using the CODA software (1). There was no significant (n.s.) difference ( $P > 0.01$ ,  $\chi^2$ ).

1. Gauthier F, Martin OC, Falque M (2011) CODA (crossover distribution analyzer): quantitative characterization of crossover position patterns along chromosomes. *BMC Bioinformatics* 12:27.

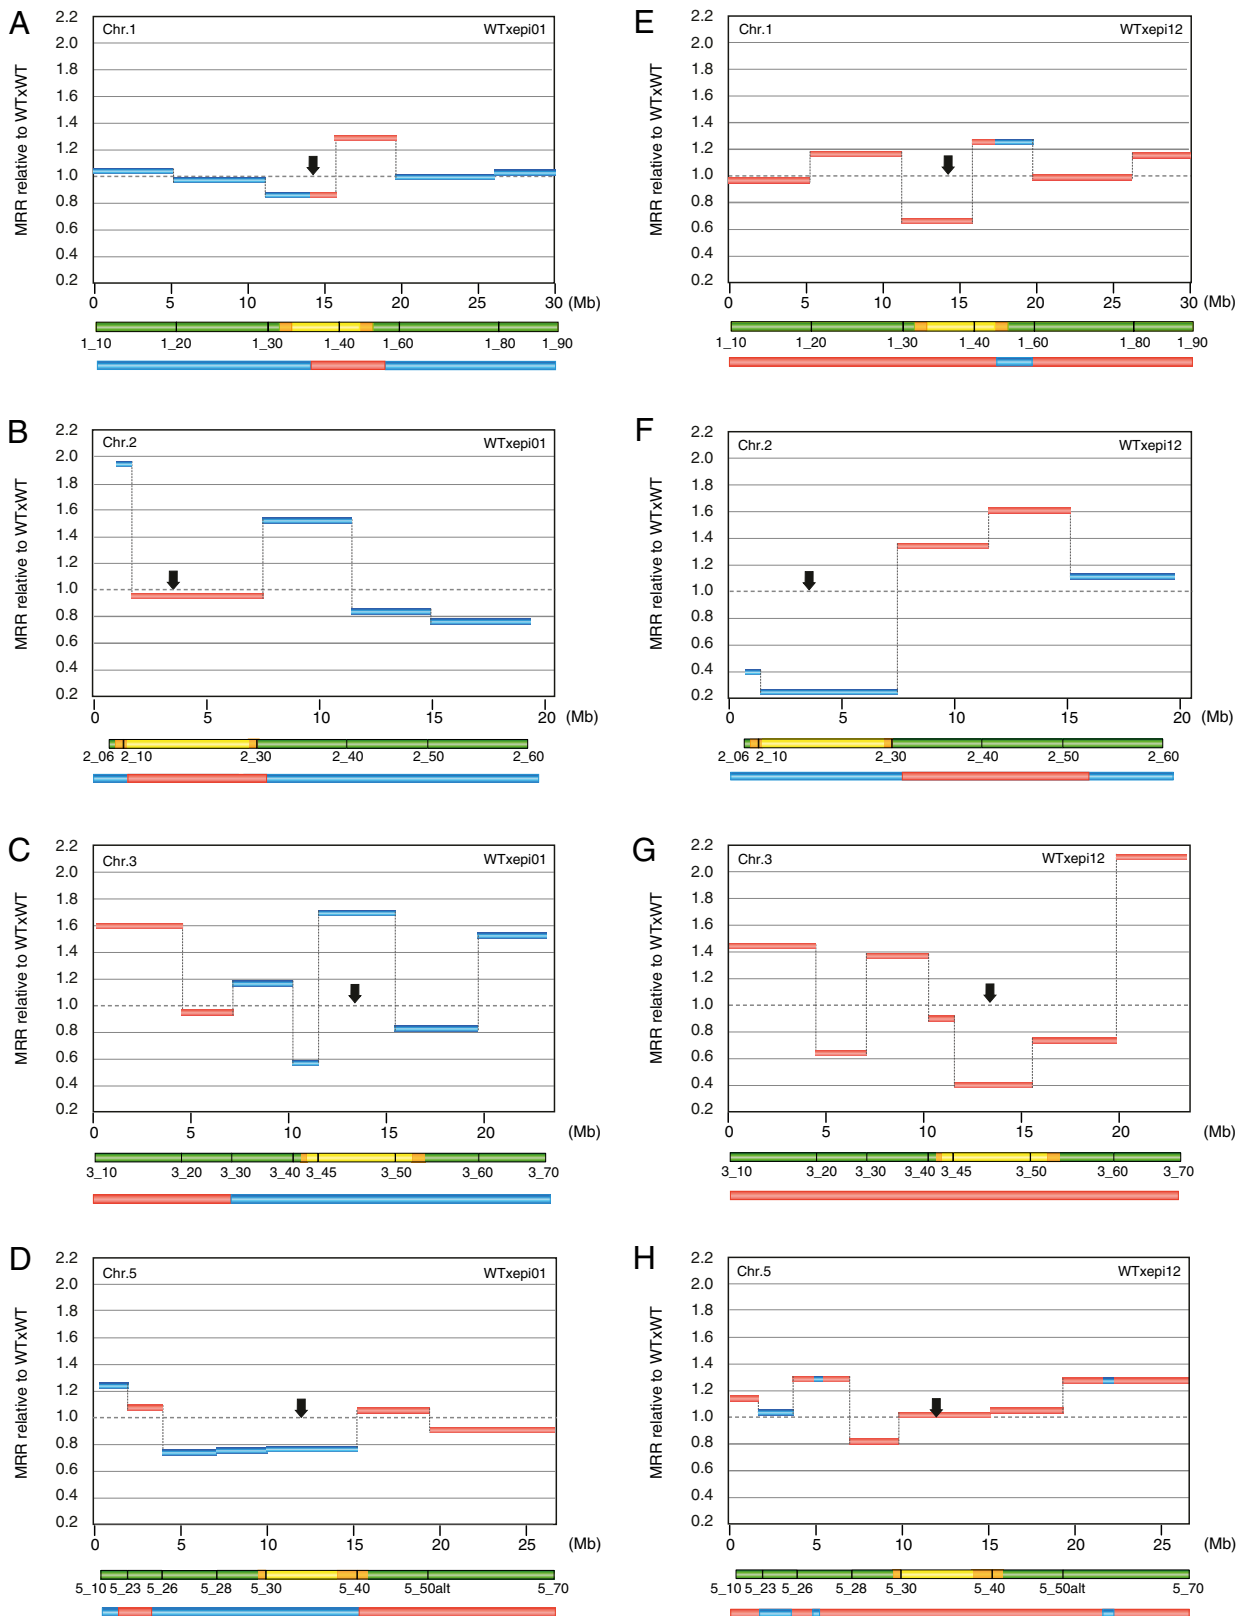

**Fig. 54.** Effect of the epi01 and epi12 parents on MRR along *Arabidopsis* chromosomes. F2 plants originating from the cross between WT and epi01 (WTxepi01 population) or WT and epi12 (WTxepi12 population) were genotyped by using KASP markers. Calculated MRRs were compared with the data obtained with the control cross (WTxWT). Legend is as in Fig. 4C. (A–D) WTxepi01 MRRs for chromosomes 1, 2, 3, 5, respectively. (E–H) WTxepi12 MRRs for chromosomes 1, 2, 3, 5, respectively. EpiRIL methylation map below each graph shows WT-like (light red boxes) and *met1*-like (light blue boxes) blocks inherited from WT and *met1* parents, respectively, as detected by genome-wide DNA methylation profiling (1). Black arrow, centromere location, Mb, chromosome coordinates in Mb.

1. Reinders J, et al. (2009) Compromised stability of DNA methylation and transposon immobilization in mosaic *Arabidopsis* epigenomes. *Genes Dev* 23:939–950.

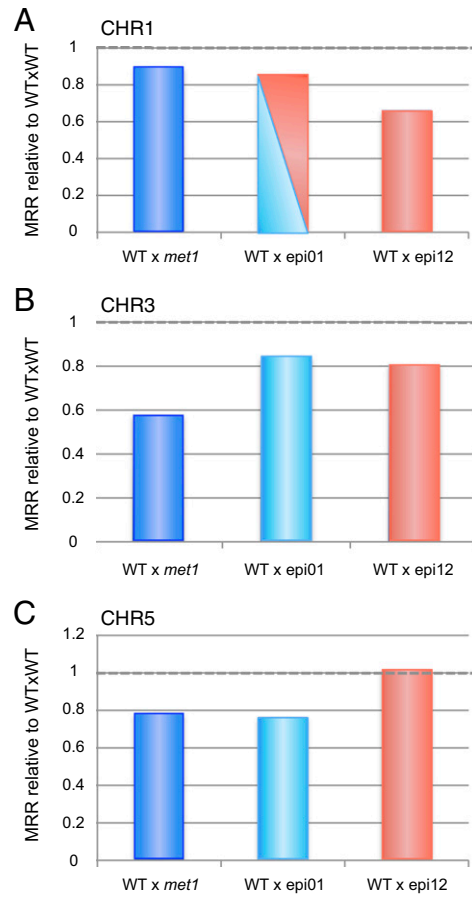

**Fig. S5.** MRRs in heterochromatic intervals in  $WT \times met1$ ,  $WT \times epi01$ , and  $WT \times epi12$  relative to  $WT \times WT$ . F2 plants originating from the cross between WT and *epi01* ( $WT \times epi01$  population) and WT and *epi12* ( $WT \times epi12$  population) were genotyped by using KASP markers. Calculated MRRs were compared with the data obtained with the control cross ( $WT \times WT$ ). Legend is as in Fig. 4B. (A) Chromosome 1. (B) Chromosome 3. (C) Chromosome 5.

**Table S1. Meiotic recombination frequency calculations using KASP markers**

| Left marker | Right marker | Interval size, Mb | Chromatin       | DNA methylation pattern |              | Meiotic recombination frequencies, % |         |          |          |       |         | MRR, cM/Mb |          | MRR relative to WTxWT |         |          |          |
|-------------|--------------|-------------------|-----------------|-------------------------|--------------|--------------------------------------|---------|----------|----------|-------|---------|------------|----------|-----------------------|---------|----------|----------|
|             |              |                   |                 | epi01                   | epi12        | WTxWT                                | WTxmet1 | WTxepi01 | WTxepi12 | WTxWT | WTxmet1 | WTxepi01   | WTxepi12 | WTxWT                 | WTxmet1 | WTxepi01 | WTxepi12 |
| 1_10        | 1_20         | 5.20              | Euchromatin     | met1-like               | wt-like      | 13.86                                | 15.58   | 14.50    | 13.54    | 2.66  | 2.99    | 2.79       | 2.60     | 1.00                  | 1.12    | 1.05     | 0.98     |
| 1_20        | 1_30         | 6.03              | Euchromatin     | met1-like               | wt-like      | 20.48                                | 20.88   | 20.02    | 23.82    | 3.40  | 3.46    | 3.32       | 3.95     | 1.00                  | 1.02    | 0.98     | 1.16     |
| 1_30        | 1_40         | 4.63              | Heterochromatin | wt/met1-like            | wt-like      | 10.95                                | 9.84    | 9.41     | 7.27     | 2.37  | 2.13    | 2.03       | 1.57     | 1.00                  | 0.90    | 0.86     | 0.66     |
| 1_40        | 1_60         | 3.93              | Heterochromatin | wt-like                 | wt/met1-like | 13.45                                | 12.50   | 17.46    | 16.85    | 3.42  | 3.18    | 4.44       | 4.29     | 1.00                  | 0.93    | 1.30     | 1.25     |
| 1_60        | 1_80         | 6.57              | Euchromatin     | met1-like               | wt-like      | 19.45                                | 24.14   | 19.40    | 19.28    | 2.96  | 3.68    | 2.95       | 2.94     | 1.00                  | 1.24    | 1.00     | 0.99     |
| 1_80        | 1_90         | 3.81              | Euchromatin     | met1-like               | wt-like      | 14.73                                | 11.93   | 15.19    | 16.92    | 3.86  | 3.13    | 3.98       | 4.44     | 1.00                  | 0.81    | 1.03     | 1.15     |
| 2_06        | 2_10         | 0.61              | Heterochromatin | met1-like               | met1-like    | 2.38                                 | 3.05    | 4.59     | 0.93     | 3.88  | 4.97    | 7.49       | 1.52     | 1.00                  | 1.28    | 1.93     | 0.39     |
| 2_10        | 2_30         | 5.94              | Heterochromatin | met1-like               | met1-like    | 18.21                                | 7.48    | 17.05    | 4.36     | 3.07  | 1.26    | 2.87       | 0.73     | 1.00                  | 0.41    | 0.94     | 0.24     |
| 2_30        | 2_40         | 3.96              | Euchromatin     | met1-like               | wt-like      | 9.95                                 | 14.37   | 14.97    | 13.32    | 2.51  | 3.63    | 3.78       | 3.36     | 1.00                  | 1.44    | 1.50     | 1.34     |
| 2_40        | 2_50         | 3.58              | Euchromatin     | met1-like               | wt-like      | 8.17                                 | 11.42   | 6.74     | 13.14    | 2.28  | 3.19    | 1.88       | 3.67     | 1.00                  | 1.40    | 0.83     | 1.61     |
| 2_50        | 2_60         | 4.44              | Euchromatin     | met1-like               | met1/wt-like | 17.30                                | 19.86   | 13.04    | 19.24    | 3.90  | 4.48    | 2.94       | 4.33     | 1.00                  | 1.15    | 0.75     | 1.11     |
| 3_10        | 3_20         | 4.42              | Euchromatin     | wt-like                 | wt-like      | 9.71                                 | 17.09   | 15.48    | 14.01    | 2.20  | 3.86    | 3.50       | 3.17     | 1.00                  | 1.76    | 1.59     | 1.44     |
| 3_20        | 3_30         | 2.60              | Euchromatin     | wt-like                 | wt-like      | 4.22                                 | 7.05    | 3.92     | 2.70     | 1.62  | 2.71    | 1.51       | 1.04     | 1.00                  | 1.67    | 0.93     | 0.64     |
| 3_30        | 3_40         | 3.19              | Euchromatin     | met1-like               | wt-like      | 13.83                                | 18.67   | 15.88    | 18.89    | 4.34  | 5.86    | 4.98       | 5.93     | 1.00                  | 1.35    | 1.15     | 1.37     |
| 3_40        | 3_45         | 1.30              | Heterochromatin | met1-like               | wt-like      | 10.92                                | 4.69    | 6.08     | 9.78     | 8.38  | 3.60    | 4.67       | 7.51     | 1.00                  | 0.43    | 0.56     | 0.90     |
| 3_45        | 3_50         | 3.98              | Heterochromatin | met1-like               | wt-like      | 3.79                                 | 2.97    | 6.39     | 1.51     | 0.95  | 0.75    | 1.61       | 0.38     | 1.00                  | 0.78    | 1.69     | 0.40     |
| 3_50        | 3_60         | 4.31              | Euchromatin     | met1-like               | wt-like      | 20.61                                | 18.04   | 16.68    | 15.09    | 4.79  | 4.19    | 3.87       | 3.50     | 1.00                  | 0.88    | 0.81     | 0.73     |
| 3_60        | 3_70         | 3.49              | Euchromatin     | met1-like               | wt-like      | 7.20                                 | 14.43   | 10.91    | 15.18    | 2.06  | 4.13    | 3.12       | 4.35     | 1.00                  | 2.00    | 1.51     | 2.11     |
| 5_10        | 5_23         | 1.55              | Euchromatin     | met1-like               | wt-like      | 10.03                                | 11.01   | 12.48    | 11.44    | 6.45  | 7.08    | 8.03       | 7.36     | 1.00                  | 1.10    | 1.24     | 1.14     |
| 5_23        | 5_26         | 2.04              | Euchromatin     | wt-like                 | met1-like    | 4.12                                 | 6.65    | 4.48     | 4.23     | 2.02  | 3.27    | 2.20       | 2.08     | 1.00                  | 1.61    | 1.09     | 1.03     |
| 5_26        | 5_28         | 3.19              | Euchromatin     | met1-like               | wt-like      | 4.82                                 | 8.18    | 3.57     | 6.17     | 1.51  | 2.56    | 1.12       | 1.93     | 1.00                  | 1.70    | 0.74     | 1.28     |
| 5_28        | 5_30         | 2.90              | Euchromatin     | met1-like               | wt-like      | 15.43                                | 17.22   | 11.67    | 12.61    | 5.33  | 5.94    | 4.03       | 4.35     | 1.00                  | 1.12    | 0.76     | 0.82     |
| 5_30        | 5_40         | 5.30              | Heterochromatin | met1-like               | wt-like      | 13.20                                | 10.41   | 10.09    | 13.43    | 2.49  | 1.96    | 1.91       | 2.54     | 1.00                  | 0.79    | 0.76     | 1.02     |
| 5_40        | 5_50alt      | 4.18              | Heterochromatin | wt-like                 | wt-like      | 19.30                                | 21.28   | 20.37    | 20.29    | 4.62  | 5.10    | 4.88       | 4.86     | 1.00                  | 1.10    | 1.06     | 1.05     |
| 5_50alt     | 5_70         | 7.37              | Euchromatin     | wt-like                 | wt-like      | 19.52                                | 30.89   | 17.70    | 24.87    | 2.65  | 4.19    | 2.40       | 3.37     | 1.00                  | 1.58    | 0.91     | 1.27     |

For each interval euchromatic or heterochromatic features (Fig. S1) and parental origin for DNA methylation [WT-like or met1-like, according to Reinders et al. (1); see Fig. S4] are indicated.

1. Reinders J, et al. (2009) Compromised stability of DNA methylation and transposon immobilization in mosaic *Arabidopsis* epigenomes. *Genes Dev* 23:939-950.

**Table S2. Expression of genes involved in meiotic recombination in epi12 compared with WT, as determined by genome-wide expression analysis**

| Gene name                     | Gene ID   | Epi vs. WT (fold change) | P value | Ref. |
|-------------------------------|-----------|--------------------------|---------|------|
| Early meiotic events          |           |                          |         |      |
| AML1                          | AT5G61960 | 1.001                    | 0.9696  | 1    |
| AML2                          | AT2G42890 | 0.948                    | 0.2835  | 1    |
| AML3                          | AT4G18120 | 0.632                    | 0.0002  | 1    |
| AML4                          | At5G07290 | 0.988                    | 0.8424  | 1    |
| AML5                          | AT1G29400 | 0.943                    | 0.3343  | 1    |
| SWI1                          | AT5G51330 | 1.058                    | 0.6687  | 1    |
| MEI1                          | AT1G77320 | 0.912                    | 0.3328  | 1    |
| CDC45                         | AT3G25100 | 1.046                    | 0.8001  | 1    |
| SDS                           | AT1G14750 | 0.966                    | 0.6426  | 1    |
| TAM                           | AT1G77390 | 0.848                    | 0.4489  | 1    |
| MS5                           | AT4G20900 | 1.031                    | 0.6945  | 1    |
| MMD1                          | AT1G66170 | 0.993                    | 0.9424  | 1    |
| ASK1                          | AT1G75950 | 1.108                    | 0.3699  | 1    |
| CAP-E1                        | AT5G62410 | 1.065                    | 0.5453  | 1    |
| SC                            |           |                          |         |      |
| ASY1                          | AT1G67370 | 0.857                    | 0.1100  | 1    |
| ASY2                          | AT4G32200 | 0.956                    | 0.4882  | 1    |
| Cohesins and cohesion release |           |                          |         |      |
| SYN1                          | AT5G05490 | 1.056                    | 0.7731  | 1    |
| SCC3                          | AT2G47980 | 0.999                    | 0.9873  | 1    |
| AESP                          | AT4G22970 | 0.980                    | 0.8596  | 1    |
| DSB formation                 |           |                          |         |      |
| AtSPO11-1                     | AT3G13170 | 1.011                    | 0.9296  | 2    |
| AtSPO11-2                     | AT1G63990 | 0.838                    | 0.1073  | 2    |
| AtPRD1                        | AT4G14180 | 0.962                    | 0.5693  | 2    |
| AtPRD2                        | AT5G57880 | ND                       | ND      | 2    |
| AtPRD3                        | AT1G01690 | 1.132                    | 0.3124  | 2    |
| DSB processing                |           |                          |         |      |
| AtMRE11                       | AT5G54260 | 0.936                    | 0.3220  | 2    |
| AtRAD50                       | AT2G31970 | 0.894                    | 0.1994  | 2    |
| AtNBS1                        | AT3G02680 | 0.915                    | 0.3692  | 2    |
| AtCOM1                        | AT3G52115 | 1.122                    | 0.0780  | 2    |
| DNA strand exchange           |           |                          |         |      |
| AtRAD51                       | AT5G20850 | 1.151                    | 0.5484  | 2    |
| AtDMC1                        | AT3G22880 | 1.042                    | 0.6255  | 2    |
| AtRAD51C                      | AT2G45280 | 0.816                    | 0.2128  | 2    |
| AtXRCC3                       | AT5G57450 | 0.942                    | 0.4132  | 2    |
| AtRPA1a                       | AT2G06510 | 0.702                    | 0.0023  | 2    |
| AtBRCA2                       | AT5G01630 | 0.838                    | 0.1499  | 2    |
| AtMND1                        | AT4G29170 | 1.200                    | 0.1395  | 2    |
| Crossover formation           |           |                          |         |      |
| RCK                           | AT3G27730 | 1.034                    | 0.5856  | 2    |
| AtMSH4                        | AT4G17380 | 0.920                    | 0.5755  | 2    |
| AtMSH5                        | AT3G20475 | 0.943                    | 0.7556  | 2    |
| AtZIP3                        | AT2G32270 | 1.074                    | 0.4086  | 2    |
| AtZIP4                        | AT1G10970 | 0.953                    | 0.8139  | 2    |
| AtPTD                         | AT1G12790 | 0.823                    | 0.3952  | 2    |
| AtSHOC1                       | AT5G52290 | 0.918                    | 0.2183  | 2    |
| AtZYP1a                       | AT1G22260 | 0.903                    | 0.2385  | 2    |
| AtZYP1b                       | AT1G22275 | 0.932                    | 0.5938  | 2    |
| AtMLH3                        | AT4G35520 | 0.869                    | 0.0361  | 2    |
| AtMUS81                       | AT4G30870 | 0.897                    | 0.3579  | 2    |
| Early recombination           |           |                          |         |      |
| ATM                           | AT3G48190 | 0.981                    | 0.8011  | 1    |
| Late recombination            |           |                          |         |      |
| MLH1                          | AT4G09140 | 1.014                    | 0.9310  | 1    |

The list of genes involved in recombination was established from refs. 1 and 2. No gene was detected as being differentially up-regulated (>twofold) or down-regulated (>0.5-fold) in epi12 compared with WT. ND, not present on the array.

1. Mercier R, Grelon M (2008) Meiosis in plants: Ten years of gene discovery. *Cytogenet Genome Res* 120:281–290.
2. Osman K, Higgins JD, Sanchez-Moran E, Armstrong SJ, Franklin FCH (2011) Pathways to meiotic recombination in *Arabidopsis thaliana*. *New Phytol* 190:523–544.



**Table S3. INDEL marker details**

| INDEL marker name | CHR | position (Mp) | Col allele (bp) | Forward Primer Sequence        | Reverse Primer Sequence     |
|-------------------|-----|---------------|-----------------|--------------------------------|-----------------------------|
| T1O3              | 2   | 1.5           | 879             | TGTGGTATTGGAATGATTTGAACTTCAGG  | CCCTCTTCTCCTTTTCTCCTGTAACC  |
| T26I20            | 2   | 6.3           | 762             | CAAGAAATTGAAAAACAGAGACTGTGATCG | GATGTTACTCCGATCAAAGAGAGGAGG |
| T4C9              | 4   | 7.3           | 815             | GACCAAGCTTCGTTATCGAAGATAACC    | AAAGAGAACTCACCGCATACC       |
| F13M23            | 4   | 12.8          | 800             | TCTGAGATGAGAGAACGCAT           | TGCAACTAACTTCAAAC           |

**Table S4. KASP marker details**

| KASP marker | CHR | Position, bp | Col allele | Ler allele | SNP upstream sequence            |
|-------------|-----|--------------|------------|------------|----------------------------------|
| 1_10        | 1   | 32 209       | T          | C          | GATCAACCTGAATGAGAGAAT            |
| 1_20        | 1   | 5 236 460    | A          | G          | TTGACAGATTTGGTTCGTCT             |
| 1_30        | 1   | 11 267 086   | T          | G          | AATCCATATTTCTGACCACGGAACGGAAAT   |
| 1_40        | 1   | 15 893 603   | A          | T          | AAAGATTGTGTTAATGATTTTGATTT       |
| 1_60        | 1   | 19 821 699   | T          | C          | CATGTTATAGTAGTAAACCGGA           |
| 1_80        | 1   | 26 388 796   | G          | A          | TGAGAAATCCAGAAAGCCTGA            |
| 1_90        | 1   | 30 200 826   | T          | C          | TGGGAAGTGGAGAGATCATT             |
| 2_06        | 2   | 876 519      | A          | G          | GTAACACAAAGTATCACTTGGA           |
| 2_10        | 2   | 1 489 332    | C          | G          | TCTCTATAAGGAATAGTATGTCAGGAGATAT  |
| 2_30        | 2   | 7 424 354    | T          | C          | GATGATCTGAGCAATCAACAGAAAGAAG     |
| 2_40        | 2   | 11 385 252   | C          | T          | CACCGTCCCATTGGTTGAT              |
| 2_50        | 2   | 14961718     | C          | T          | AATTGAGTACCTGGAGC                |
| 2_60        | 2   | 19 400 043   | G          | T          | TAGTAATGCTGAGCAACATC             |
| 3_10        | 3   | 68 195       | C          | T          | TCACATCCCTGTTGATCATAACGATTCACTCA |
| 3_20        | 3   | 4 491 688    | C          | T          | TGTAAATTTGCAAAGAAATCAGAATA       |
| 3_30        | 3   | 7 092 629    | C          | T          | AAGGAAAGGAACTAGTAATGATGAATT      |
| 3_40        | 3   | 10 278 811   | T          | G          | AACTGTAAAACATGGGAAGG             |
| 3_45        | 3   | 11 581 079   | G          | T          | GATCTATCACAGTATGAAGGACA          |
| 3_50        | 3   | 15 558 472   | G          | C          | AAATTATGTGTAGATCATGTATC          |
| 3_60        | 3   | 19 864 963   | A          | T          | TGCAGCAGCTTCCATGGACGCCGTCAC      |
| 3_70        | 3   | 23 358 425   | G          | A          | GCAGAGGAGATGCTCAGAAGATCG         |
| 5_10        | 5   | 233 020      | C          | G          | CTCTTATTGATGATTGATGATAT          |
| 5_23        | 5   | 1 787 276    | A          | G          | TAACCGAAATGGATGTTCTT             |
| 5_26        | 5   | 3 823 313    | G          | A          | AAGTTACAATTTGGATCTACG            |
| 5_28        | 5   | 7 016 783    | T          | G          | TGTCACCGCCACTACAAGCT             |
| 5_30        | 5   | 9 913 838    | A          | G          | TGTTTAAGGTTGGATGTGGCTAG          |
| 5_40        | 5   | 15 211 469   | G          | A          | TTAATAGCACACGTGGCGAGATACATC      |
| 5_50alt     | 5   | 19 386 885   | G          | T          | CTTCATCACATATCTGTTGATATC         |
| 5_70        | 5   | 26 757 636   | G          | T          | ATCATAAAATCAAATG                 |

**Table S5. Number of F2 plants analyzed for KASP genotyping in the four populations**

| Marker (KASP) | WTxWT samples | WTx <i>met1</i> samples | WTxepi01 samples | WTxepi12 samples |
|---------------|---------------|-------------------------|------------------|------------------|
| 1_10          | 148           | 179                     | 172              | 171              |
| 1_20          | 149           | 184                     | 171              | 170              |
| 1_30          | 146           | 181                     | 172              | 169              |
| 1_40          | 144           | 179                     | 172              | 167              |
| 1_60          | 151           | 180                     | 172              | 167              |
| 1_80          | 150           | 171                     | 169              | 170              |
| 1_90          | 148           | 182                     | 170              | 170              |
| 2_06          | 150           | 183                     | 169              | 166              |
| 2_10          | 150           | 183                     | 170              | 167              |
| 2_30          | 150           | 181                     | 166              | 167              |
| 2_40          | 149           | 176                     | 170              | 164              |
| 2_50          | 149           | 180                     | 170              | 164              |
| 2_60          | 149           | 179                     | 170              | 163              |
| 3_10          | 149           | 178                     | 171              | 170              |
| 3_20          | 149           | 178                     | 169              | 171              |
| 3_30          | 148           | 181                     | 172              | 170              |
| 3_40          | 146           | 178                     | 170              | 169              |
| 3_45          | 149           | 181                     | 171              | 169              |
| 3_50          | 150           | 174                     | 170              | 169              |
| 3_60          | 147           | 175                     | 169              | 168              |
| 3_70          | 148           | 183                     | 171              | 169              |
| 5_10          | 148           | 169                     | 171              | 167              |
| 5_23          | 149           | 183                     | 172              | 171              |
| 5_26          | 151           | 181                     | 171              | 169              |
| 5_28          | 150           | 182                     | 172              | 169              |
| 5_30          | 149           | 181                     | 169              | 169              |
| 5_40          | 150           | 181                     | 171              | 172              |
| 5_50alt       | 149           | 173                     | 86               | 165              |
| 5_70          | 148           | 179                     | 170              | 172              |
| Total         | 4,313         | 5,195                   | 4,858            | 4,884            |
